# Supplementary material
Source: PubMed Central journal article supplement (PMC2629944)
Supplement: NIHMS86627-supplement-1_si_001.pdf [file NIHMS86627-supplement-1_si_001.pdf]

## Supporting Information

for

### **Aryl bis(Diazeniumdiolates): Potent Inducers of S-Glutathionylation of Cellular Proteins and Their in Vitro Anti-proliferative Activities**

Daniela Andrei, Anna E. Maciag, Harinath Chakrapani, Michael L. Citro, Larry K.

Keefer, and Joseph E. Saavedra

*Chemistry Section, Laboratory of Comparative Carcinogenesis, National Cancer Institute at Frederick, Frederick, Maryland 21702, and Basic Research Program, SAIC-Frederick, National Cancer Institute at Frederick, Frederick, Maryland 21702*

#### Elemental Analysis Data

For **3b**:

| <u>Element</u> | <u>Calcd for C<sub>10</sub>H<sub>12</sub>FN<sub>5</sub>O<sub>6</sub></u> | <u>Found</u> |
|----------------|--------------------------------------------------------------------------|--------------|
| C              | 37.86                                                                    | 37.99        |
| H              | 3.81                                                                     | 3.79         |
| F              | 5.99                                                                     | 6.20         |
| N              | 22.08                                                                    | 21.70        |

For **4a**:

| <u>Element</u> | <u>Calcd for C<sub>15</sub>H<sub>21</sub>N<sub>9</sub>O<sub>10</sub></u> | <u>Found</u> |
|----------------|--------------------------------------------------------------------------|--------------|
| C              | 36.96                                                                    | 37.18        |
| H              | 4.34                                                                     | 4.41         |
| N              | 25.86                                                                    | 25.64        |

For **4b**:

| <u>Element</u> | <u>Calcd for C<sub>16</sub>H<sub>23</sub>N<sub>9</sub>O<sub>10</sub></u> | <u>Found</u> |
|----------------|--------------------------------------------------------------------------|--------------|
| C              | 38.33                                                                    | 38.08        |

|   |       |       |
|---|-------|-------|
| H | 4.62  | 4.52  |
| N | 25.14 | 24.62 |

For **4c**:

| <u>Element</u> | <u>Calcd for C<sub>17</sub>H<sub>25</sub>N<sub>9</sub>O<sub>10</sub></u> | <u>Found</u> |
|----------------|--------------------------------------------------------------------------|--------------|
| C              | 39.61                                                                    | 39.43        |
| H              | 4.89                                                                     | 4.88         |
| N              | 24.46                                                                    | 24.01        |

For **4d**:

| <u>Element</u> | <u>Calcd for C<sub>17</sub>H<sub>26</sub>N<sub>10</sub>O<sub>9</sub></u> | <u>Found</u> |
|----------------|--------------------------------------------------------------------------|--------------|
| C              | 39.69                                                                    | 39.45        |
| H              | 5.09                                                                     | 5.42         |
| N              | 27.23                                                                    | 27.63        |

For **4e**:

| <u>Element</u> | <u>Calcd for C<sub>16</sub>H<sub>19</sub>N<sub>11</sub>O<sub>8</sub></u> | <u>Found</u> |
|----------------|--------------------------------------------------------------------------|--------------|
| C              | 38.95                                                                    | 38.92        |
| H              | 3.88                                                                     | 4.03         |
| N              | 31.23                                                                    | 30.97        |

For **4f**:

| <u>Element</u> | <u>Calcd for C<sub>13</sub>H<sub>18</sub>N<sub>8</sub>O<sub>8</sub></u> | <u>Found</u> |
|----------------|-------------------------------------------------------------------------|--------------|
| C              | 37.68                                                                   | 37.47        |
| H              | 4.38                                                                    | 4.22         |
| N              | 27.04                                                                   | 26.74        |

For **4g**:

| <u>Element</u> | <u>Calcd for C<sub>14</sub>H<sub>20</sub>N<sub>8</sub>O<sub>8</sub></u> | <u>Found</u> |
|----------------|-------------------------------------------------------------------------|--------------|
| C              | 39.25                                                                   | 39.45        |
| H              | 4.71                                                                    | 4.91         |
| N              | 26.16                                                                   | 26.02        |

For **4h**:

| <u>Element</u> | <u>Calcd for C<sub>12</sub>H<sub>16</sub>N<sub>8</sub>O<sub>8</sub></u> | <u>Found</u> |
|----------------|-------------------------------------------------------------------------|--------------|
|----------------|-------------------------------------------------------------------------|--------------|

|   |       |       |
|---|-------|-------|
| C | 36.00 | 35.87 |
| H | 4.03  | 4.07  |
| N | 27.99 | 27.63 |

For **4i**:

| <u>Element</u> | <u>Calcd for C<sub>13</sub>H<sub>18</sub>N<sub>8</sub>O<sub>9</sub></u> | <u>Found</u> |
|----------------|-------------------------------------------------------------------------|--------------|
| C              | 36.28                                                                   | 35.87        |
| H              | 4.22                                                                    | 4.41         |
| N              | 26.04                                                                   | 25.70        |

For **4j**:

| <u>Element</u> | <u>Calcd for C<sub>12</sub>H<sub>18</sub>N<sub>8</sub>O<sub>8</sub></u> | <u>Found</u> |
|----------------|-------------------------------------------------------------------------|--------------|
| C              | 35.82                                                                   | 36.10        |
| H              | 4.51                                                                    | 4.64         |
| N              | 27.85                                                                   | 27.75        |

For **5a**:

| <u>Element</u> | <u>Calcd for C<sub>17</sub>H<sub>25</sub>N<sub>9</sub>O<sub>10</sub></u> | <u>Found</u> |
|----------------|--------------------------------------------------------------------------|--------------|
| C              | 39.61                                                                    | 39.64        |
| H              | 4.89                                                                     | 4.85         |
| N              | 24.46                                                                    | 24.62        |

For **5b**:

| <u>Element</u> | <u>Calcd for C<sub>22</sub>H<sub>33</sub>N<sub>11</sub>O<sub>11</sub></u> | <u>Found</u> |
|----------------|---------------------------------------------------------------------------|--------------|
| C              | 42.10                                                                     | 42.27        |
| H              | 5.30                                                                      | 5.63         |
| N              | 24.55                                                                     | 24.62        |

For **5c**:

| <u>Element</u> | <u>Calcd for C<sub>19</sub>H<sub>30</sub>N<sub>10</sub>O<sub>9</sub></u> | <u>Found</u> |
|----------------|--------------------------------------------------------------------------|--------------|
| C              | 42.06                                                                    | 42.27        |
| H              | 5.57                                                                     | 5.61         |
| N              | 25.82                                                                    | 25.56        |

For **5d**:

| <u>Element</u> | <u>Calcd for C<sub>15</sub>H<sub>22</sub>N<sub>8</sub>O<sub>9</sub></u> | <u>Found</u> |
|----------------|-------------------------------------------------------------------------|--------------|
| C              | 39.30                                                                   | 39.62        |
| H              | 4.84                                                                    | 4.81         |
| N              | 24.45                                                                   | 24.62        |

For **6**:

| <u>Element</u> | <u>Calcd for C<sub>16</sub>H<sub>22</sub>N<sub>8</sub>O<sub>10</sub></u> | <u>Found</u> |
|----------------|--------------------------------------------------------------------------|--------------|
| C              | 39.51                                                                    | 39.27        |
| H              | 4.56                                                                     | 4.35         |
| N              | 23.04                                                                    | 22.67        |

For **7**:

| <u>Element</u> | <u>Calcd for C<sub>16</sub>H<sub>18</sub>N<sub>8</sub>O<sub>12</sub>.0.2EtOAc</u> | <u>Found</u> |
|----------------|-----------------------------------------------------------------------------------|--------------|
| C              | 37.93                                                                             | 37.78        |
| H              | 3.71                                                                              | 3.78         |
| N              | 21.06                                                                             | 21.06        |
